# Supplementary material for: Introducing standardized field methods for fracture-focused surface process research
Source: Copernicus journal article supplement (doi:10.5194/esurf-12-35-2024), 2024-01-05
Supplement: Supplementary file 1 [file esurf-12-35-2024-supplement.zip]

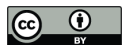

## *Supplement of*

# **Introducing standardized field methods for fracture-focused surface process research**

**Martha Cary Eppes et al.**

*Correspondence to:* Martha Cary Eppes (meppes@charlotte.edu)

- esurf-12-35-2024-supplement-title-page.pdf
- Data Supplement CRACK SHEETS.xlsx
- Data Supplement To Scale Figures.pdf

The copyright of individual parts of the supplement might differ from the article licence.
