# Supplementary material for: Introducing standardized field methods for fracture-focused surface process research
Source: Copernicus journal article supplement (doi:10.5194/esurf-12-35-2024), 2024-01-05
Supplement: Supplementary file 2 [file esurf-12-35-2024-supplement.zip]

FIGURE 5

Ensure this figure is accurately printed to scale prior to use in the field

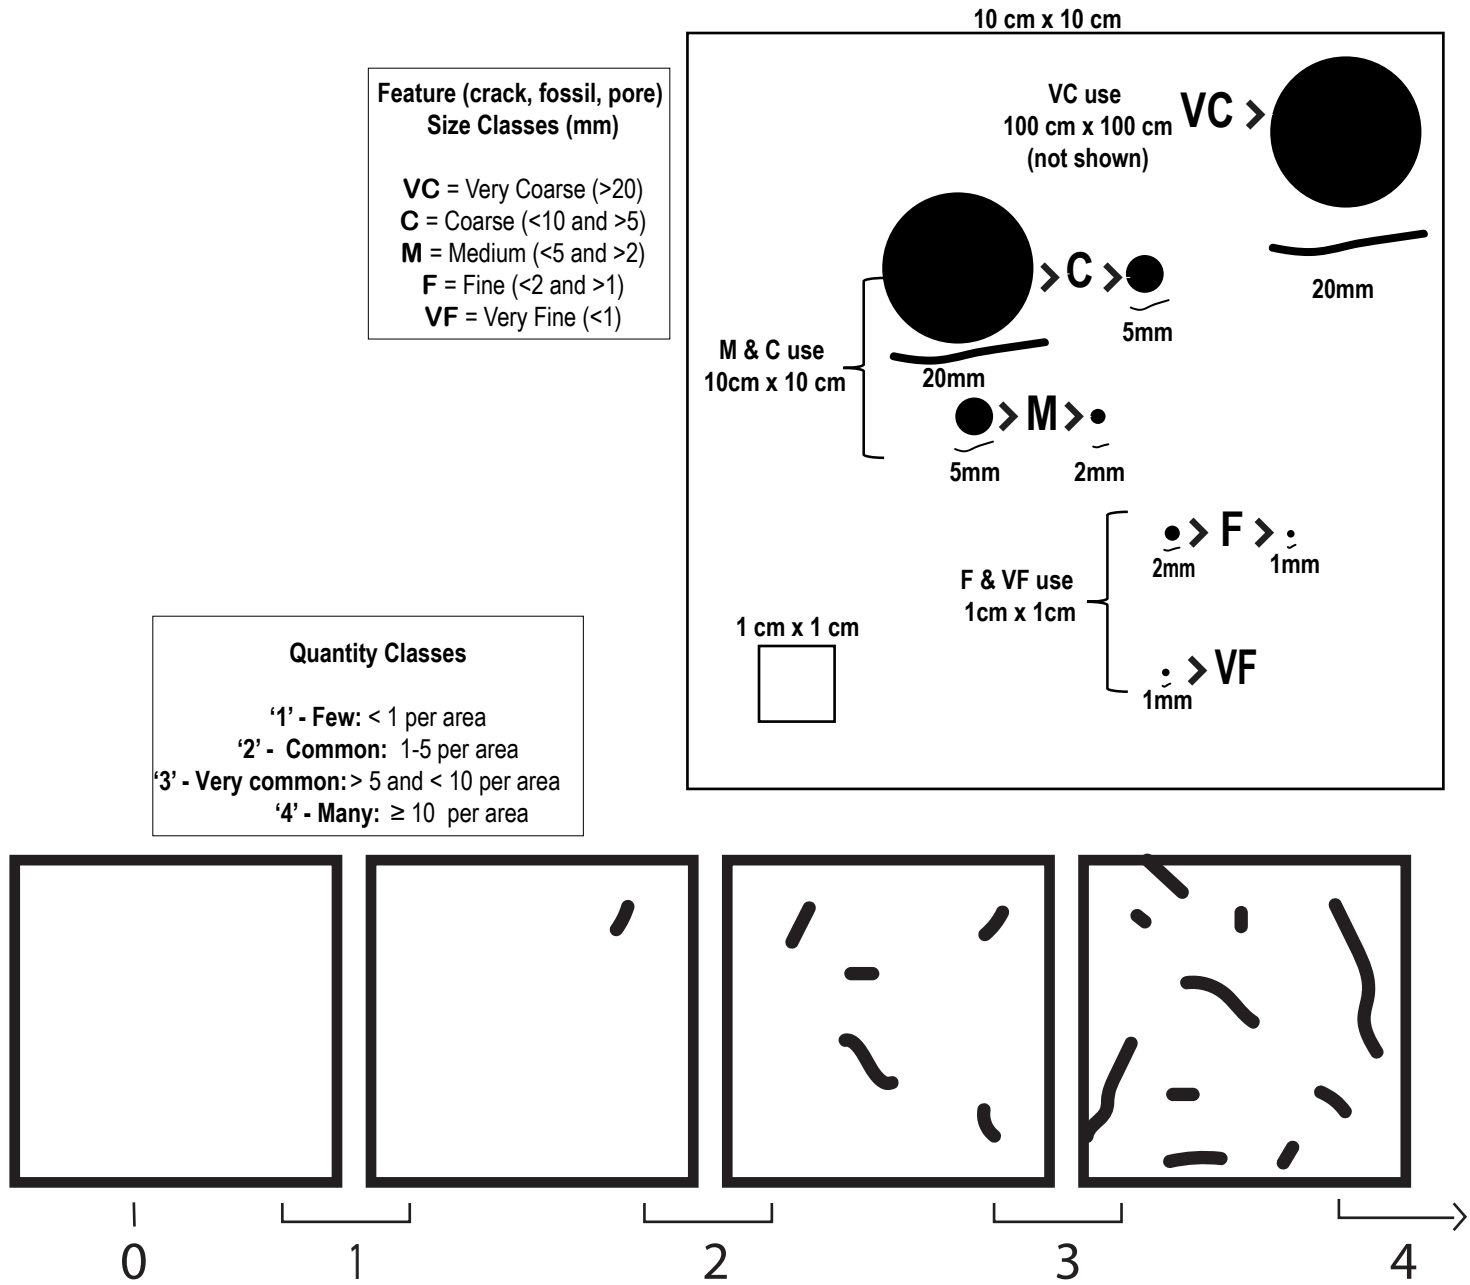

FIGURE 6

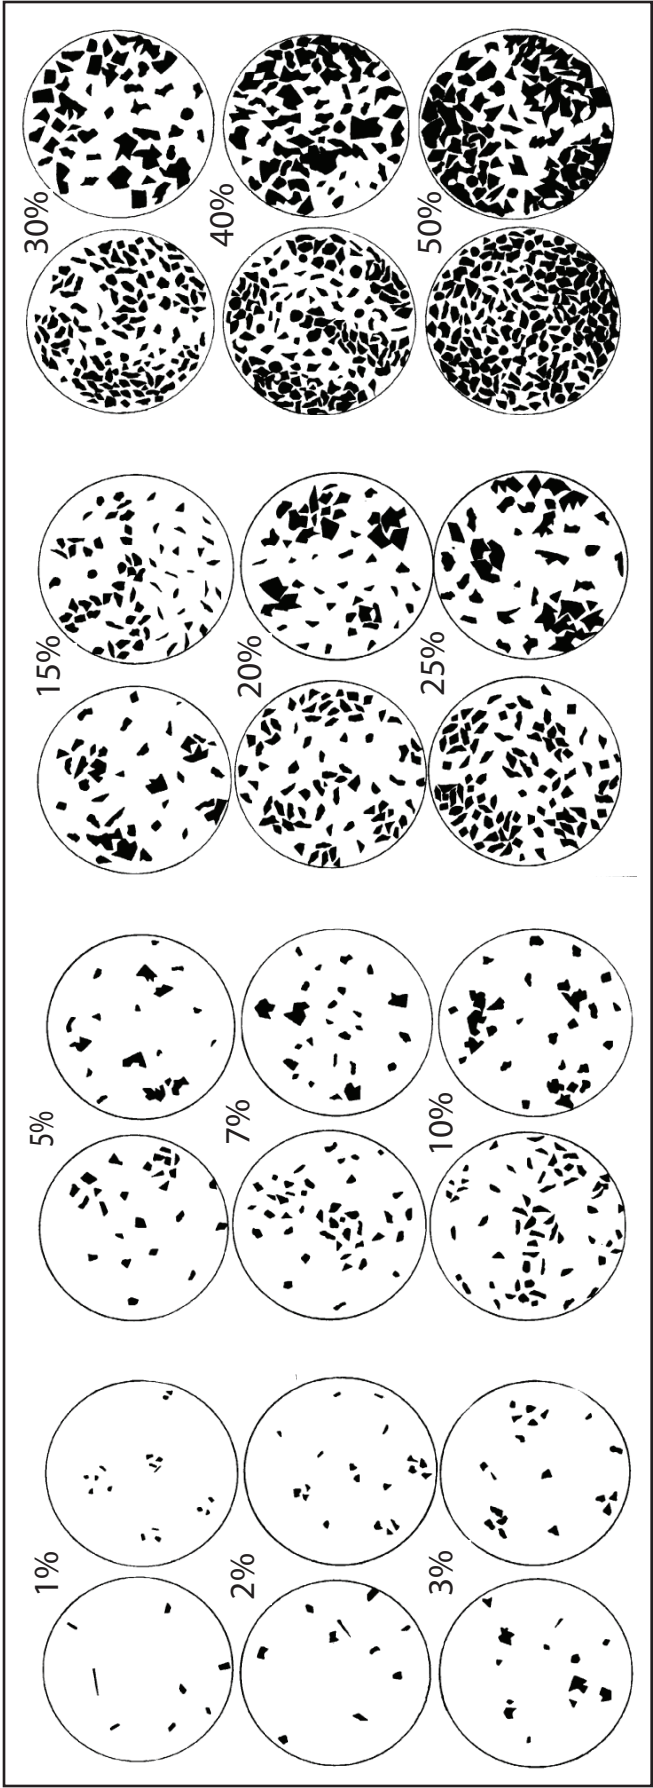

FIGURE 7

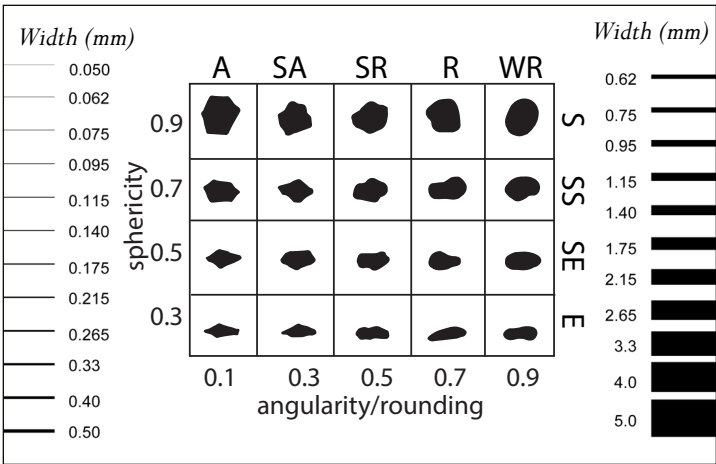

Ensure this figure is accurately printed to scale prior to use in the field
