# Supplementary material for: Introducing standardized field methods for fracture-focused surface process research
Source: Copernicus journal article supplement (doi:10.5194/esurf-12-35-2024), 2024-01-05
Supplement: Supplementary file 3 [file esurf-12-35-2024-supplement.zip]

Archive with 3 entries (3 files):
- esurf-12-35-2024-supplement-title-page.pdf
- Data Supplement To Scale Figures.pdf
- Data Supplement CRACK SHEETS.xlsx
